# 1 **Challenges and perspectives of quantitative functional sodium imaging** 2 **(fNaI)**

3 Claudia AM Gandini Wheeler-Kingshott<sup>\*^1,2,3</sup>, Frank Reimer<sup>^1,4</sup>, Fulvia Palesi<sup>5</sup>, Antonio Ricciardi<sup>1</sup>,  
4 Gloria Castellazzi<sup>1,6</sup> Xavier Golay<sup>7</sup>, Ferran Prados<sup>1,8,9</sup>, Bhavana Solanky<sup>1</sup>, Egidio U D'Angelo<sup>2,10</sup>

5 <sup>1</sup>NMR Research Unit, Queen Square MS Centre, Department of Neuroinflammation, UCL Institute  
6 of Neurology, Faculty of Brain Sciences, University College London, London, UK

7 <sup>2</sup>Department of Brain and Behavioural Sciences, University of Pavia, Pavia, Italy

8 <sup>3</sup>Brain MRI 3T Mondino Research Center, IRCCS Mondino Foundation, Pavia, Italy

9 <sup>4</sup>Department of Radiology, School of Clinical Medicine, University of Cambridge, Cambridge,  
10 United Kingdom

11 <sup>5</sup>Neuroradiology Unit, IRCCS Mondino Foundation, Pavia, Italy

12 <sup>6</sup>Department of Electrical, Computer and Biomedical Engineering, University of Pavia, Pavia, Italy

13 <sup>7</sup>NMR Research Unit, Queen Square MS Centre, Department of Brain Repair and Rehabilitation,  
14 UCL Institute of Neurology, Faculty of Brain Sciences, University College London, London, UK

15 <sup>8</sup> Centre for Medical Image Computing (CMIC), Department of Medical Physics and Bioengineering,  
16 University College London, Malet Place Engineering Building, London, WC1E 6BT, United  
17 Kingdom

18 <sup>9</sup> Universitat Oberta de Catalunya, Barcelona, Spain

19 <sup>10</sup> Brain Connectivity Centre, IRCCS Mondino Foundation, Pavia, Italy

20 <sup>^</sup>Equally contributed to this work

21

22

## 23 **\* Correspondence:**

24 Claudia AM Gandini Wheeler-Kingshott  
25 c.wheeler-Kingshott@ucl.ac.uk

26 **Keywords: sodium imaging, functional imaging, neuronal activity, BOLD, MRI**

## 27 **Abstract**

28 Brain function has been investigated via the blood oxygenation level dependent (BOLD) effect using  
29 magnetic resonance imaging (MRI) for the past decades. Advances in sodium imaging offer the  
30 unique chance to access signal changes directly linked to sodium ions (<sup>23</sup>Na) flux across the cell  
31 membrane, which generates action potentials, hence signal transmission in the brain. During this  
32 process <sup>23</sup>Na transiently accumulates in the intracellular space. Here we show that quantitative

33 functional sodium imaging (fNaI) at 3T is potentially sensitive to  $^{23}\text{Na}$  concentration changes during  
34 finger tapping, which can be quantified in grey and white matter regions key to motor function. For  
35 the first time, we measured a  $^{23}\text{Na}$  concentration change of 0.54 mmol/l in the ipsilateral cerebellum,  
36 0.46 mmol/l in the contralateral primary motor cortex, 0.27 mmol/l in the corpus callosum and -11  
37 mmol/l in the ipsilateral primary motor cortex, suggesting that fNaI is sensitive to distributed  
38 functional alterations. Open issues persist on the role of the glymphatic system in maintaining  $^{23}\text{Na}$   
39 homeostasis, the role of excitation and inhibition as well as volume distributions during neuronal  
40 activity. Hemodynamic and physiological signal recordings coupled to realistic models of tissue  
41 function will be critical to understand the mechanisms of such changes and contribute to meeting the  
42 overarching challenge of measuring neuronal activity *in vivo*.

## 43 **Introduction**

44 Ever since the blood oxygenation level dependent (BOLD) effect was described, functional magnetic  
45 resonance imaging (fMRI) has dominated neuroscience as a mean to evaluate brain activity (Ogawa  
46 et al., 1990b, 1990a, 1992). It allows mapping of signal changes generated by the mismatch between  
47 oxygen delivery and consumption upon neuronal activation. While providing significant insight into  
48 brain function, a major limitation of BOLD is that it is an indirect measure of function and is affected  
49 by subject-specific haemodynamic factors. Thus, an approach that could directly measure neuronal  
50 activity in humans *in vivo*, non-invasively, would have a major advantage over BOLD-fMRI.

51 In this paper, we propose that, thanks to sodium MRI technology, we are within reach of measuring  
52 directly a local transient change of sodium ions ( $^{23}\text{Na}$ ) concentration in the intracellular space.  
53 During activity, neuronal action potentials cause a transient  $^{23}\text{Na}$  flux from the extracellular to  
54 intracellular space over a temporal scale of several milliseconds. If sodium imaging, dynamically  
55 repeated, was successful in detecting  $^{23}\text{Na}$  concentration changes evoked by specific tasks, it would  
56 open up a new way of investigating human brain function, complementing BOLD-fMRI.

57 Imaging aspects of the brain electrical activity, other than BOLD, related to transmembrane sodium-  
58 potassium ion exchange during depolarization could provide a direct access to primary brain function  
59 everywhere. Although sodium channels are predominantly located in the axonal initial segment  
60 (Chadderton et al., 2004; Dover et al., 2016; Häusser and Clark, 1997; Masoli et al., 2015; Powell et  
61 al., 2015; Rancz et al., 2007), they are also expressed in Ranvier nodes along the white matter (WM)  
62 axons. While BOLD signals capture mainly the large energy demand supporting brain function  
63 related to the sodium-potassium pump to re-establish ionic gradients after action potentials—in gray  
64 matter (GM) (Brockhaus et al., 1993; Koch and Barish, 1994),  $^{23}\text{Na}$  concentration changes could be  
65 sensitive to activity also in WM and therefore contribute to our understanding of brain circuits  
66 involved in specific tasks.

67 Despite its limitations, BOLD-fMRI has been very successful in neurological research applications to  
68 study mechanisms of disease. Pathologies where blood perfusion is impaired, such as multiple  
69 sclerosis (Paling et al., 2013) and stroke (Sakatani et al., 2007), reveal alterations during task BOLD  
70 fMRI. However, these may be mediated by a dysfunction in evoked blood oxygenation or by  
71 neuronal damage itself. Experimental neurophysiology also indicates that psychiatric conditions,  
72 such as autism, are characterised by altered patterns of neuronal firing, which are difficult to capture  
73 *in vivo* using BOLD-fMRI (Giza et al., 2010; Leblond et al., 2014). Considering its substantial  
74 research output, BOLD-fMRI is rarely used clinically, though, besides pre-surgical planning. Yet,  
75 while growing evidence supports that minimising residual tumour mass improves survival, false  
76 functional localisation may render it less effective (Morrison et al., 2016; Suchorska et al., 2016).

77 This means that there is a pressing need for tools able to directly map brain function, rather than  
78 through hemodynamic effects, and with greater reliability. Again, measuring  $^{23}\text{Na}$  concentration  
79 changes could meet this need, complementing BOLD-fMRI, with the potential of impacting clinical  
80 practice.

81 From a physiological point of view, neuronal cells' function has recently been mapped *in vitro* with  
82 high specificity, describing distribution and functionality of  $^{23}\text{Na}$  channels with incredible details  
83 (Dover et al., 2016; Masoli et al., 2015). In parallel, physiological studies have also led to a better  
84 understanding of the neurovascular coupling (Howarth et al., 2009; Lippert et al., 2010; Mapelli et  
85 al., 2016) at the origin of the BOLD-fMRI signal (Ogawa et al., 1990b, 1990a, 1992). These data are  
86 the bases for constructing emerging realistic models of neuronal activity, built on ever accurate  
87 physiological recordings of cellular function, and could provide an invaluable tool to interpret large  
88 scale measures of brain function from MRI (D'Angelo and Wheeler-Kingshott, 2017; Friston et al.,  
89 2017; Blanchard et al., 2016).

90 From a technological point of view, it is now feasible to measure  $^{23}\text{Na}$  concentrations *in vivo*, which  
91 are key in retaining physiologically balanced tissues. Indeed, it is now possible to non-invasively  
92 measure quantitatively total (i.e. intra + extra cellular)  $^{23}\text{Na}$  concentrations (TSC) of the human brain  
93 tissue *in vivo* using high field MRI scanners (Thulborn, 2018). Furthermore,  $^{23}\text{Na}$  in the intra and  
94 extracellular spaces have different MR properties due to their cellular environment, hence any  
95 alteration in volume fractions or in intra or extracellular  $^{23}\text{Na}$  concentrations could affect the  
96 measured TSC. Arguably one could say that TSC is sensitive to changes due to tissue composition as  
97 well as to pathological changes of cellularity, albeit with a lower sensitivity than proton ( $^1\text{H}$ ), or  
98 indeed due to transient TSC changes ( $\Delta\text{TSC}$ ) during functional activity.

99 With preliminary data and biophysical hypothesis of  $\Delta\text{TSC}$  changes in tissue *in vivo*, we intend to  
100 establish a framework for developing functional sodium imaging (fNaI), demonstrating an exciting  
101 opportunity for measuring brain function and potentially neuronal activity, addressing a pressing  
102 need for a multi-disciplinary integration.

## 103 **Methods**

104 **Subjects:** 8 right-handed healthy volunteers (mean age 33yrs, range 27-45, 5 males) gave written  
105 consent to this study approved by the NRES Committee London – Harrow, in accordance with the  
106 Declaration of Helsinki.

107 **fNaI acquisition protocol:** Data was acquired on a 3T Philips Achieva system (Philips, Netherlands)  
108 with a single-tuned volume head-coil (Rapid, Germany) using a 4-times undersampled 3D-Cones  
109 ultra-short echo time sequence (Gurney et al., 2006; Riemer et al., 2014), 4mm isotropic resolution,  
110 240mm field-of-view,  $90^\circ$  flip-angle,  $\text{TR}=50\text{ms}$ ,  $\text{TE}=0.22\text{ms}$ , 6 NEX, total scan time per  
111 volume=60s. TE was defined as from the end of the pulse to the start of readout (0.22 ms). The RF  
112 pulse was  $320\ \mu\text{s}$ , so the time from the centre of the RF pulse to the start of readout is 0.38ms. The  
113 length of the readout was 30ms.

114 **fNaI paradigm design:** fNaI was performed back-to-back 6-times (3-rest conditions interleaved with  
115 3-tasks). Subjects were asked (verbally) to perform a right-hand finger-tapping task (self-pacing at a  
116 frequency of 1Hz), opposing the thumb to each one of the fingers, repeatedly from the index to the  
117 little finger and back, with ample extension of the movements.

118 fNaI data analysis: Images were reconstructed to 2mm isotropic resolution using SNR-enhancing  
119 sub-Nyquist k-space sample weighting (Pipe, 2000). All analyses were performed with SPM8.  
120 Images were rigidly registered, smoothed with a  $8 \times 8 \times 8 \text{mm}^3$  Gaussian-kernel and normalised to the  
121 proton density (PD) MNI152 template. Statistical analysis was performed using the SPM8-PET  
122 group analysis toolbox. Statistical maps were calculated with  $p=0.001$ , cluster extent of  $k = 20$  voxels  
123 and family-wise error (FWE) correction.

124 fNaI clusters identification: Maps of t-statistics were saved from the fNaI data analysis and imported  
125 in the xjview toolbox (<http://www.alivelearn.net/xjview>) of SPM for a detailed cluster report in terms  
126 of peak, number of voxels, location and anatomical areas involved in Tailarach atlas space (Yoon et  
127 al., 2012).

128 Sodium ions ( $^{23}\text{Na}$ ) flux and  $\Delta\text{TSC}$ : Voxel-wise TSC was calculated according to (Christensen et al.,  
129 1996), using two reference phantoms (33 and 66 mmol/l sodium agar) placed either side of the brain  
130 for 4 out of 8 volunteers.  $\Delta\text{TSC}$  was calculated from TSC on/off maps for cerebellar, ipsi and  
131 contralateral primary motor cortex (M1) and corpus callosum (CC) clusters and reported as (mean  
132  $\Delta\text{TSC} \pm$  standard deviation) across the 4 subjects.

## 133 **Results**

134 fNaI was successfully performed in 8 subjects during a right-hand finger-tapping task at 3T. Figure  
135 1a) shows transverse slices from one fNaI volume of a randomly chosen subject, while Figure 1b)  
136 shows fNaI statistical activation maps from the group analysis. A total of 16 main clusters were  
137 identified and are reported in Table 1. These include the contralateral M1 (Precentral), somatosensory  
138 (Postcentral) and supplementary motor (Superior Frontal) gyri, and the ipsilateral anterior cerebellum  
139 (lobule I-IV) as well as lobule VI, Crus I-II and the dentate nucleus (Figure 1c)). Noticeable are the  
140 large number of ipsilateral areas that were also activated in the ipsilateral cerebrum (e.g., frontal and  
141 temporal lobes, postcentral gyrus, deep grey matter including the right thalamus, the insular cortex,  
142 the limbic lobe and parahippocampal gyrus. The lingual gyrus, Brodmann areas (BA) 2, 19 and 37  
143 were also activated ipsilaterally to the movement). Interestingly, WM areas were identified in the CC,  
144 contralateral paracentral lobule and medial frontal gyrus, corticospinal tract (CST), posterior  
145 cingulum and ipsilateral supramarginal gyrus.

146  $\Delta\text{TSC}$  in the anterior cerebellar cluster was  $(0.54 \pm 0.17)$  mmol/l, while it was  $(0.27 \pm 0.08)$  mmol/l  
147 in the CC,  $(0.46 \pm 0.10)$  mmol/l in the contralateral M1; a negative  $\Delta\text{TSC}$  change was measured in  
148 the ipsilateral M1  $(-0.11 \pm 0.06)$  mmol/l.

## 149 **Discussion**

150 We have shown preliminary evidence that brain function can be assessed non-invasively by sodium  
151 imaging *in vivo* using a 3T MRI scanner, a major step forward in the overarching aim to directly  
152 assess neuronal activity. Indeed, fNaI successfully detected changes in activation between finger  
153 tapping and rest across the entire brain. Activations in motor and executive control areas indicate that  
154 fNaI has the potential to be an effective biomarker of functional activity.

155 The localisation of activated regions is conveying interesting results. Several clusters are at the  
156 border between GM and WM, where a high concentration of sodium channels in the axon initial  
157 segment could lead to a large intracellular  $^{23}\text{Na}$  accumulation (Dover et al., 2016). The task  
158 employed in this initial experiment was indeed demanding: one minute of self-paced finger tapping  
159 requires motor planning and concentration. Interestingly, as well as M1 (BA4), the study shows

160 activations in the primary somatosensory cortex (BA2), i.e. the main cortical area for processing the  
161 sense of touch, and in the premotor cortex (BA6), which is involved (with the cerebellum) in self-  
162 pacing finger tapping (Mak et al., 2016; Witt et al., 2008). In the cerebellum, activations occurred in  
163 posterior ipsilateral areas, namely Crus I/II, lobule VI, and lobule VIIIa, which are heavily involved  
164 in integrative aspects of motor control and cognitive processing (Mak et al., 2016; Witt et al., 2008).  
165 A further finding is the presence of patches of activity in WM, including: the CST, which is the  
166 major pathway for the motor system; the superior longitudinal fasciculus that connects parietal to  
167 prefrontal cortices with associative fibres integrating body awareness and perception; the CC, which  
168 connects both hemispheres; the cingulum, which receives afferent fibres from the thalamus, as part of  
169 the spino-thalamic tract. These tracts are myelinated and enriched in sodium channels at the nodes of  
170 Ranvier, forming the axonal pathways wiring-up the sensorimotor network. Given that ionic fluxes  
171 (including those involving astrocytes) are generally smaller in WM than GM, it will be important to  
172 verify these activations in future studies, to exclude possible partial volume effects and to assess  
173 whether neurotransmitter signaling could cause enough accumulation of  $^{23}\text{Na}$  at synapsis junctions  
174 to be detectable with fNaI. If these results were going to be confirmed, reconstruction of axonal  
175 circuits supporting functions would find invaluable information in WM matter fNaI results.

176 From the present data it is impossible to determine the mechanisms underlying fNaI changes, i.e.  
177 does  $\Delta\text{TSC}$  reflect sensitivity mainly to the shift of  $^{23}\text{Na}$  between the intracellular and extracellular  
178 compartments (Gilles et al., 2017), or does it reflect also changes in vascular and perivascular spaces  
179 through neurovascular coupling between glucose metabolism and increase blood delivery? In other  
180 words, we cannot exclude that in the present measurements, a significant contribution comes from  
181 the blood. Moreover, given the experimental TR, T1-weighting could play a role in the contrast: any  
182 excess of blood-related signal flowing through the vessels in activated regions could lead to  
183 artefactual increases in sodium signal. Future fNaI studies should consider minimizing this possible  
184 effect.

185 Whilst a precise estimate would require sophisticated models and combinations of experimental  
186 measurements *in vivo* and *in vitro*, here we can probe likely/expected scenarios and propose some *ab*  
187 *initio* calculations. Can the molar flux of  $^{23}\text{Na}$  displaced during activity be sufficient to generate a  
188 meaningful fNaI signal? For example, in the cerebellum,  $\Delta\text{TSC}$  was  $0.54 \pm 0.17$  mmol/l. The  
189 measured ATP consumption during activity in the cerebellar cortex is 20.5 mmol of ATP/(g·min)  
190 (Howarth et al., 2009, 2012; Sokoloff et al., 1977). Of this ATP, ~50% is used for computation while  
191 the other ~50% for maintenance (Brockhaus et al., 1993; Koch and Barish, 1994; Howarth et al.,  
192 2009, 2012), so about 10 mmol of ATP/(g·min) are used for function. One ATP corresponds to  
193 shifting three  $^{23}\text{Na}$  (previously accumulated inside the cell) through the cell membrane to re-  
194 establish ionic balance; this means that during activity there is a shift of the order of 30 mmol/(g·min)  
195 of  $^{23}\text{Na}$ , i.e.  $30 \cdot 10^3$  mmol/(l·min) of  $^{23}\text{Na}$ , which is orders of magnitude larger than our measured  
196 value. Therefore, there is sufficient  $^{23}\text{Na}$  displacement to possibly explain the fNaI signal. The larger  
197  $^{23}\text{Na}$  displacement expected from calculations compared to  $\Delta\text{TSC}$  is likely to reflect the fact that,  
198 while  $^{23}\text{Na}$  enters through sodium channels during the action potentials, soon thereafter it leaves the  
199 cell through sodium-potassium pumps and sodium exchangers. What is established during a given  
200 time-frame is a dynamic equilibrium between  $^{23}\text{Na}$  influx and efflux with a residual unbalance, that  
201 is potentially captured by the measured  $\Delta\text{TSC}$ . But there are yet other sources of  $^{23}\text{Na}$  flux that  
202 should be considered. Other fluxes that contribute to reaching equilibrium are due to  $^{23}\text{Na}$  co-  
203 transport with other ions, metabolites and neurotransmitters in neurons and glial cells, in support of  
204 the energy budget during activation (Dienel et al., 2008; Hertz et al., 2015; DiNuzzo et al., 2017).  
205 How all of these contribute to  $\Delta\text{TSC}$  sign and magnitude remains to be discovered. Furthermore,  
206 with the current  $4 \times 4 \times 4 \text{mm}^3$  resolution of fNaI, it is also possible that this displacement - which

## Quantitative functional sodium imaging (fNaI)

207 happens on a microstructure scale - is actually diluted or even averaged out. It is also important to  
208 assess the contribution of changes in cerebral blood volume (CBV) during brain function and  
209 changes in Virchow-Robin space volume (VRSV) and the glymphatic system. During functional  
210 activity CBV changes because of the arteriole (CBVa), where CBVa at rest is of the order of  
211 0.8ml/100g, with a change of  $\Delta\text{CBVa}=0.34\text{ml}/100\text{g}$  (Hua et al., 2011; Kim et al., 2007; Lee et al.,  
212 2001). This is transferred to the capillaries, where the venous side passively follows the arterioles  
213 dilation and resistance changes, which induce blood flow and volume changes (Buxton, 2012). If  
214  $\Delta\text{CBVa}$  is added to the extracellular space compartment, reducing the cellular volume fraction even  
215 by as little as 0.5%, this would be enough to cause  $\Delta\text{TSC}$  of the order of the measured one, given the  
216 10 times higher extracellular molar concentration. This  $\Delta\text{CBVa}$ , though, would not affect the  $\Delta\text{TSC}$   
217 measured if its fractional volume was balanced by a corresponding reduction in VRSV, i.e. if the  
218 extracellular space (CBV + extracellular matrix + VRSV) and the cellular space (e.g. intracellular  
219 space + myelin) proportions remained constant. In this hypothesis, the perivascular space and  
220 therefore the glymphatic system, would work as a compensatory chamber, with “rigid” neuronal  
221 structures within the extracellular matrix (Thulborn, 2018). The cerebrospinal fluid role in buffering  
222 the changes in CBV during functional activity has been investigated and reported to be reduced  
223 during activation, using relaxometry in the visual cortex, which would support this hypothesis  
224 (Piechnik et al., 2009).

225 On the other hand, we must not forget that the  $\Delta\text{TSC}$  measured experimentally in this study *in vivo* is  
226 an “apparent” TSC change, as the current acquisition protocol cannot distinguish between the intra  
227 and extracellular sodium, but can only record the overall TSC, sensitive to both altered volume  
228 fractions or altered intra and extra cellular concentrations. Moreover, the spatial resolution of sodium  
229 imaging at 3T is poor (with a nominal resolution of  $4\times 4\times 4\text{mm}^3$ ), which implies that our  
230 measurements are currently affected by partial volume. In particular, head motion could affect voxels  
231 adjacent to CSF, and be responsible for increase or decrease  $\Delta\text{TSC}$  in such areas. However,  
232 acquisition of a sufficient number of (control - rest) images should provide statistical power to  
233 account for any motion not sufficiently corrected by registration. Furthermore, the functional  
234 paradigm here is non-standard and would benefit from faster image acquisition methods to increase  
235 the temporal resolution of the experiment. Nevertheless, the results presented here are all statistically  
236 significant and FWE corrected ( $p<0.001$ , 20 voxels).

237 Ultimately, one could speculate on the tissue composition of an imaging voxel further and try to  
238 assess the potential contribution to  $\Delta\text{TSC}$  coming from many compartments, defining e.g. fractions of  
239 the axonal volume, soma, myelin, extra cellular matrix (including astrocytes), VRSV (or CSF) space  
240 and CBV. A comprehensive model should consider exchange of  $^{23}\text{Na}$  at synapsis and in other cells  
241 such as glial cells, be adapted for different brain regions and different functional tasks (Alahmadi et  
242 al., 2017).

243 This is therefore a proposal for a novel framework, essential for advancing our understanding of the  
244 human brain function, where knowledge must bridge gaps between cellular and large-scale systems  
245 (D’Angelo and Wheeler-Kingshott, 2017). Dedicated major efforts should be employed to speed up  
246 acquisition and at the same time improve spatial resolution of sodium imaging. Potentially, this  
247 emerging and exciting field of research could greatly benefit from higher field strength systems (e.g.  
248 7T) (Ranjeva et al., 2018; Riemer et al., 2015). In order to disentangle the sources of the quantitative  
249  $\Delta\text{TSC}$  from fNaI, it would be important to design multi-modal studies that assess a number of  
250 variables, such as CBV, CBF, oxygen consumption rates and metabolism for a better estimate of  
251 brain energy dynamics (Germuska et al., 2018). Models of fNaI changes could be validated using a  
252 range of hemodynamic and physiological signal recordings, including e.g. magnetoencephalography

253 (MEG), near infrared spectroscopy (NIRS) and positron emission tomography (PET), (Shibasaki,  
254 2008).

255 In conclusion, sodium changes during activity are sufficiently large to be detected and quantified  
256 using fNaI *in vivo*. Preliminary quantitative data show encouraging results in terms of coherence of  
257 the  $\Delta$ TSC values between cerebellum and M1 (0.54 vs 0.46 mmol/l). Interpretations of the reduced  
258 value of  $\Delta$ TSC in the CC (0.27 mmol/l) and of the negative  $\Delta$ TSC in the ipsilateral M1 (-11 mmol/l)  
259 (Hamzei et al., 2002) must be cautious and deferred to future studies. Improvements in data  
260 acquisition and computational modelling of neurovascular coupling in relation to  $^{23}\text{Na}$  flux during  
261 action potential generation and maintenance could open a new way forward to assess neuronal  
262 activation in humans *in vivo* non-invasively.

## 263 **Tables**

### 264 **Table 1**

265 Clusters of activations and identification of areas involved according to the Tailarach atlas in  
266 XJVIEW. In red are right (ipsilateral) clusters and in blue are left (contralateral) clusters with respect  
267 to the hand used for the task. Mean TSC per cluster together with its standard error (SE) has been  
268 reported.

269

## 270 **Figures**

### 271 **Figure 1**

272 a) Example of transverse slices from a single functional sodium imaging (fNaI) volume after smoothing. The  
273 circles either side of the brain are known concentration phantoms. Signal to noise ratio in WM was  
274 measured as  $(17.5 \pm 1.4)$  a.u. in all 8 subjects. b) Activation clusters from proof of concept fNaI experiment  
275 where the subject performed a 1Hz finger-tapping paradigm. Results are from group analysis of 8 volunteers  
276 (FWE corrected,  $p < 0.001$ , 20 voxels), overlaid on 3D  $T_1$ -weighted structural images with anatomical  
277 annotations. Maps were poorly localized at  $p < 0.05$ , hence the higher than usual threshold. Worth noticing that  
278 signal changes for fNaI were of the order of 10%, which is twice what is normally detected using BOLD-fMRI.  
279 Activations are seen in motor-function related areas. c) The cerebellum shows enhanced activations in Crus  
280 I/II and lobule VI related to finger tapping and motor planning. GM: gray matter and WM: white matter.

281

## 282 **Nomenclature**

283 BOLD : blood oxygenation level dependent

284 fMRI: functional Magnetic Resonance Imaging

285 fNaI: functional sodium imaging

286 MRI: magnetic resonance imaging

287 TSC: total sodium concentration

288 ATP: adenosine triphosphate

289 23Na: sodium ions

290 GM: gray matter

291 WM: white matter

292 M1: primary motor cortex

### 293 **Conflict of Interest**

294 The authors declare that the research was conducted in the absence of any commercial or financial  
295 relationships that could be construed as a potential conflict of interest.

### 296 **Author Contributions**

297 CGWK developed the idea of fNaI; FR contributed to the implementation and data acquisition and  
298 analysis; FP contributed to discussion on feasibility; AR helped with data acquisition; GC contributed  
299 to image analysis; XG participated to the development of sodium imaging and useful discussion; FP  
300 contributed to data reconstruction and analysis; BS contributed to image acquisition and  
301 development; EDA supported the idea development and contributed with physiological  
302 interpretation.

### 303 **Funding and acknowledgements**

304 The NMR unit where this work was performed is supported by grants from the UK Multiple  
305 Sclerosis Society and is supported by the UCL/UCLH NIHR (National Institute for Health Research)  
306 BRC (Biomedical Research Centre). CGWK also receives funding from the Horizon2020 EU  
307 programme (H2020-EU.3.1 (634541)), ISRT, Wings for Life, CHNF. GC has an ECTRIMS  
308 fellowship. FPr was funded for the duration of this study by the Medical Research Council (MRC).  
309 FPr has a non-Clinical Postdoctoral Guarantors of Brain fellowship. FPa is supported by the Italian  
310 Ministry of Health (NET2013-02355313). EDA receives grants from the Human Brain Project,  
311 Centro Fermi and the Italian Ministry of Health.

312

### 313 **References**

314 Alahmadi, A. A. S., Samson, R. S., Pardini, M., D'Angelo, E., Friston, K. J., Toosy, A. T., et al. (2017).  
315 Investigating the relationship between multiple grip forces and BOLD signal in the  
316 Cerebellum and dentate nuclei of MS subjects. *Front. Cell. Neurosci.*  
317 doi:10.3389/conf.fncel.2017.37.00004.

318 Blanchard S, Sallet S, Ivanov A, Benquet P, Bénar CG, Pélégrini-Issac M, Benali H, Wendling F.  
319 (2016). A New Computational Model for Neuro-Glio-Vascular Coupling: Astrocyte  
320 Activation Can Explain Cerebral Blood Flow Nonlinear Response to Interictal Events. *PLoS*  
321 *One.* 5;11(2):e0147292. doi: 10.1371/journal.pone.0147292. eCollection 2016.

322 Brockhaus, J., Ballanyi, K., Smith, J. C., and Richter, D. W. (1993). Microenvironment of  
323 respiratory neurons in the in vitro brainstem???spinal cord of neonatal rats. *J. Physiol.* 462,  
324 421–445. doi:10.1113/jphysiol.1993.sp019562.



- 325 Buxton, R. B. (2012). Dynamic models of BOLD contrast. *Neuroimage*.  
326 doi:10.1016/j.neuroimage.2012.01.012.
- 327 Chadderton, P., Margrie, T. W., and Häusser, M. (2004). Integration of quanta in cerebellar  
328 granule cells during sensory processing. *Nature*. doi:10.1038/nature02442.
- 329 Christensen, J. D., Barrere, B. J., Boada, F. E., Vevea, J. M., and Thulborn, K. R. (1996).  
330 Quantitative Tissue Sodium Concentration Mapping of Normal Rat Brain. *Magn. Reson.*  
331 *Med.* 36, 83–89.
- 332 D’Angelo, E., and Wheeler-Kingshott, C. A. M. (2017). Modelling the brain: Elementary  
333 components to explain ensemble functions. *La Riv. del Nuovo Cim.*, 297–333.
- 334 Diel GA, and Cruz NF (2008). Imaging brain activation: simple pictures of complex biology.  
335 *Ann N Y Acad Sci.* 1147:139-70. doi: 10.1196/annals.1427.011.
- 336 DiNuzzo M, Giove F, Maraviglia B, Mangia S. (2017). Computational Flux Balance Analysis  
337 Predicts that Stimulation of Energy Metabolism in Astrocytes and their Metabolic  
338 Interactions with Neurons Depend on Uptake of K<sup>+</sup> Rather than Glutamate. *Neurochem*  
339 *Res.* 42(1):202-216. doi: 10.1007/s11064-016-2048-0. Epub 2016 Sep 14.
- 340 Dover, K., Marra, C., Solinas, S., Popovic, M., Subramaniam, S., Zecevic, D., et al. (2016). FHF-  
341 independent conduction of action potentials along the leak-resistant cerebellar granule  
342 cell axon. *Nat. Commun.* 7, 12895.  
343 doi:10.1038/ncomms12895 [http://www.nature.com/articles/ncomms12895#supplement](http://www.nature.com/articles/ncomms12895#supplementary-information)  
344 [ary-information.](http://www.nature.com/articles/ncomms12895#supplementary-information)
- 345 Friston KJ, Preller KH, Mathys C, Cagnan H, Heinzle J, Razi A, Zeidman P. (2017). Dynamic causal  
346 modelling revisited. *Neuroimage* 17. pii: S1053-8119(17)30156-8. doi:  
347 10.1016/j.neuroimage.2017.02.045. [Epub ahead of print]
- 348 Germuska M, Chandler HL, Stickland RC, Foster C, Fasano F, Okell TW, Steventon J, Tomassini V,  
349 Murphy K, Wise RG. (2018). Dual-calibrated fMRI measurement of absolute cerebral  
350 metabolic rate of oxygen consumption and effective oxygen diffusivity. *Neuroimage*. pii:  
351 S1053-8119(18)30820-6. doi: 10.1016/j.neuroimage.2018.09.035. [Epub ahead of print]
- 352 Gilles, A., Nagel, A. M., and Madelin, G. (2017). Multipulse sodium magnetic resonance imaging  
353 for multicompartment quantification: Proof-of-concept. *Sci. Rep.* 7. doi:10.1038/s41598-  
354 017-17582-w.
- 355 Giza, J., Urbanski, M. J., Prestori, F., Bandyopadhyay, B., Yam, A., Friedrich, V., et al. (2010).  
356 Behavioral and Cerebellar Transmission Deficits in Mice Lacking the Autism-Linked Gene  
357 Islet Brain-2. *J. Neurosci.* 30, 14805–14816. doi:10.1523/jneurosci.1161-10.2010.
- 358 Gurney, P. T., Hargreaves, B. A., and Nishimura, D. G. (2006). Design and analysis of a practical  
359 3D cones trajectory. *Magn. Reson. Med.* 55–3, 575–582. doi:10.1002/mrm.20796.
- 360 Hamzei, F., Dettmers, C., Rzanny, R., Liepert, J., Büchel, C., and Weiller, C. (2002). Reduction of  
361 excitability (“inhibition”) in the ipsilateral primary motor cortex is mirrored by fMRI signal

- 362 decreases. *Neuroimage*. doi:10.1006/nimg.2002.1077.
- 363 Häusser, M., and Clark, B. A. (1997). Tonic synaptic inhibition modulates neuronal output  
364 pattern and spatiotemporal synaptic integration. *Neuron*. doi:10.1016/S0896-  
365 6273(00)80379-7.
- 366 Hertz L1, Xu J, Song D, Du T, Li B, Yan E, Peng L. (2015). Astrocytic glycogenolysis: mechanisms  
367 and functions. *Metab Brain Dis*. 30(1):317-33. doi: 10.1007/s11011-014-9536-1.
- 368 Howarth, C., Gleeson, P., and Attwell, D. (2012). Updated energy budgets for neural  
369 computation in the neocortex and cerebellum. *J. Cereb. Blood Flow Metab*.  
370 doi:10.1038/jcbfm.2012.35.
- 371 Howarth, C., Peppiatt-Wildman, C. M., and Attwell, D. (2009). The energy use associated with  
372 neural computation in the cerebellum. *J. Cereb. Blood Flow Metab*. 30, 403–414.  
373 doi:10.1038/jcbfm.2009.231.
- 374 Hua, J., Qin, Q., Pekar, J. J., and van Zijl, P. C. M. (2011). Measurement of absolute arterial  
375 cerebral blood volume in human brain without using a contrast agent. *NMR Biomed*.  
376 doi:10.1002/nbm.1693.
- 377 Kim, T., Hendrich, K. S., Masamoto, K., and Kim, S. G. (2007). Arterial versus total blood volume  
378 changes during neural activity-induced cerebral blood flow change: Implication for BOLD  
379 fMRI. *J. Cereb. Blood Flow Metab*. doi:10.1038/sj.jcbfm.9600429.
- 380 Koch, R. A., and Barish, M. E. (1994). Perturbation of intracellular calcium and hydrogen ion  
381 regulation in cultured mouse hippocampal neurons by reduction of the sodium ion  
382 concentration gradient. *J Neurosci*.
- 383 Leblond, C. S., Nava, C., Polge, A., Gauthier, J., Huguet, G., Lumbroso, S., et al. (2014). Meta-  
384 analysis of SHANK Mutations in Autism Spectrum Disorders: A Gradient of Severity in  
385 Cognitive Impairments. *PLOS Genet*. 10, e1004580. doi:10.1371/journal.pgen.1004580.
- 386 Lee, S. P., Duong, T. Q., Yang, G., Iadecola, C., and Kim, S. G. (2001). Relative changes of cerebral  
387 arterial and venous blood volumes during increased cerebral blood flow: Implications for  
388 bold fMRI. *Magn. Reson. Med*. doi:10.1002/mrm.1107.
- 389 Lippert MT, Steudel T, Ohl F, Logothetis NK, Kayser C. (2010). Coupling of neural activity and  
390 fMRI-BOLD in the motion area MT. *Magn Reson Imaging*. 28(8):1087-94. doi:  
391 10.1016/j.mri.2009.12.028. Epub 2010 Feb 19.
- 392 Mak, M. K. Y., Cheung, V., Ma, S., Lu, Z. L., Wang, D., Lou, W., et al. (2016). Increased cognitive  
393 control during execution of finger tap movement in people with Parkinson's disease. *J*  
394 *Parkinsons. Dis*. doi:10.3233/JPD-160849.
- 395 Mapelli, L., Gagliano, G., Soda, T., Laforenza, U., Moccia, F., and D'Angelo, E. (2016). Granular  
396 layer neurons control cerebellar neurovascular coupling through an NMDA receptor/NO  
397 — dependent system. *J. Neurosci*. doi:10.1523/jneurosci.2025-16.2016.
- 398 Masoli, S., Solinas, S., and D'Angelo, E. (2015). Action potential processing in a detailed Purkinje

- 399 cell model reveals a critical role for axonal compartmentalization. *Front. Cell. Neurosci.* 9,  
400 47. doi:10.3389/fncel.2015.00047.
- 401 Morrison, M. A., Tam, F., Garavaglia, M. M., Hare, G. M. T., Cusimano, M. D., Schweizer, T. A., et al.  
402 (2016). Sources of Variation Influencing Concordance between Functional MRI and Direct  
403 Cortical Stimulation in Brain Tumor Surgery. *Front. Neurosci.* 10.  
404 doi:10.3389/fnins.2016.00461.
- 405 Ogawa, S., Lee, T.-M., Nayak, A. S., and Glynn, P. (1990a). Oxygenation-sensitive contrast in  
406 magnetic resonance image of rodent brain at high magnetic fields. *Magn. Reson. Med.* 14,  
407 68–78. doi:10.1002/mrm.1910140108.
- 408 Ogawa, S., Lee, T. M., Kay, A. R., and Tank, D. W. (1990b). Brain magnetic resonance imaging  
409 with contrast dependent on blood oxygenation. *Proc. Natl. Acad. Sci. U. S. A.* 87, 9868–9872.  
410 Available at: <http://www.ncbi.nlm.nih.gov/pmc/articles/PMC55275/>.
- 411 Ogawa, S., Tank, D. W., Menon, R., Ellermann, J. M., Kim, S. G., Merkle, H., et al. (1992). Intrinsic  
412 signal changes accompanying sensory stimulation: functional brain mapping with  
413 magnetic resonance imaging. *Proc. Natl. Acad. Sci.* 89, 5951–5955. Available at:  
414 <http://www.pnas.org/content/89/13/5951.abstract>.
- 415 Paling, D., Thade Petersen, E., Tozer, D. J., Altmann, D. R., Wheeler-Kingshott, C. A. M., Kapoor, R.,  
416 et al. (2013). Cerebral Arterial Bolus Arrival Time is Prolonged in Multiple Sclerosis and  
417 Associated with Disability. *J. Cereb. Blood Flow Metab.* 34, 34–42.  
418 doi:10.1038/jcbfm.2013.161.
- 419 Piechnik, S. K., Evans, J., Bary, L. H., Wise, R. G., and Jezzard, P. (2009). Functional changes in CSF  
420 volume estimated using measurement of water T2 relaxation. *Magn. Reson. Med.*  
421 doi:10.1002/mrm.21897.
- 422 Pipe, J. G. (2000). Reconstructing MR images from undersampled data: data-weighting  
423 considerations. *Magn Reson Med* 43(6), 867–875.
- 424 Powell, K., Mathy, A., Duguid, I., and Häusser, M. (2015). Synaptic representation of locomotion  
425 in single cerebellar granule cells. *Elife*. doi:10.7554/eLife.07290.
- 426 Rancz, E. A., Ishikawa, T., Duguid, I., Chadderton, P., Mahon, S., and Häusser, M. (2007). High-  
427 fidelity transmission of sensory information by single cerebellar mossy fibre boutons.  
428 *Nature*. doi:10.1038/nature05995.
- 429 Ranjeva, J.-P., Bydder, M., Ridley, B., Soubrier, M., Bertinetti, M., Guye, M., et al. (2018).  
430 Functional sodium (<sup>23</sup>Na) MRI at 7T - Extracellular sodium decreases during cortical  
431 activation in the human brain. in *Proc. Intl. Soc. Mag. Reson. Med.* 26, 707.
- 432 Riemer, F., Solanky, B. S., Golay, X., D'Angelo, E., and Wheeler-Kingshott, C. A. M. (2015). Sodium  
433 fMRI detects grey and white matter activations: neuronal firing or blood volume change?  
434 in *Proc. Intl. Soc. Mag. Reson. Med.* 23, 3924.
- 435 Riemer, F., Solanky, B. S., Stehning, C., Clemence, M., Wheeler-Kingshott, C. A. M., and Golay, X.

- 436 (2014). Sodium ( $^{23}\text{Na}$ ) ultra-short echo time imaging in the human brain using a 3D-  
437 Cones trajectory. *MAGMA* 27, 35–46. doi:10.1007/s10334-013-0395-2.
- 438 Sakatani, K., Murata, Y., Fujiwara, N., Hoshino, T., Nakamura, S., Kano, T., et al. (2007).  
439 Comparison of blood-oxygen-level-dependent functional magnetic resonance imaging and  
440 near-infrared spectroscopy recording during functional brain activation in patients with  
441 stroke and brain tumors. *J. Biomed. Opt.* 12, 62110–62118. doi:10.1117/1.2823036.
- 442 Shibasaki H. (2008). Human brain mapping: hemodynamic response and electrophysiology.  
443 *Clin Neurophysiol.* 119(4):731-43. doi: 10.1016/j.clinph.2007.10.026. Epub 2008 Jan 9.
- 444 Sokoloff, L., Reivich, M., Kennedy, C., Rosiers, M. H. Des, Patlak, C. S., Pettigrew, K. D., et al.  
445 (1977). The [ $^{14}\text{C}$ ]Deoxyglucose Method for the Measurement of Local Cerebral Glucose  
446 Utilization: Theory, Procedure, and Normal Values in the Conscious and Anesthetized  
447 Albino Rat. *J. Neurochem.* doi:10.1111/j.1471-4159.1977.tb10649.x.
- 448 Suchorska, B., Weller, M., Tabatabai, G., Senft, C., Hau, P., Sabel, M. C., et al. (2016). Complete  
449 resection of contrast-enhancing tumor volume is associated with improved survival in  
450 recurrent glioblastoma—results from the DIRECTOR trial. *Neuro. Oncol.* 18, 549–556.  
451 doi:10.1093/neuonc/nov326.
- 452 Thulborn, K. R. (2018). Quantitative sodium MR imaging: A review of its evolving role in  
453 medicine. *Neuroimage.* doi:10.1016/j.neuroimage.2016.11.056.
- 454 Witt, S. T., Laird, A. R., and Meyerand, M. E. (2008). Functional neuroimaging correlates of  
455 finger-tapping task variations: An ALE meta-analysis. *Neuroimage.*  
456 doi:10.1016/j.neuroimage.2008.04.025.
- 457 Yoon, H. J., Park, K. W., Jeong, Y. J., and Kang, D. Y. (2012). Correlation between  
458 neuropsychological tests and hypoperfusion in MCI patients: Anatomical labeling using xj  
459 view and talairach daemon software. *Ann. Nucl. Med.* 26, 656–664. doi:10.1007/s12149-  
460 012-0625-0.
- 461

a)

bioRxiv preprint doi: <https://doi.org/10.1101/375055>; this version posted October 17, 2018. The copyright holder for this preprint (which was not certified by peer review) is the author/funder. All rights reserved. No reuse allowed without permission.

b)

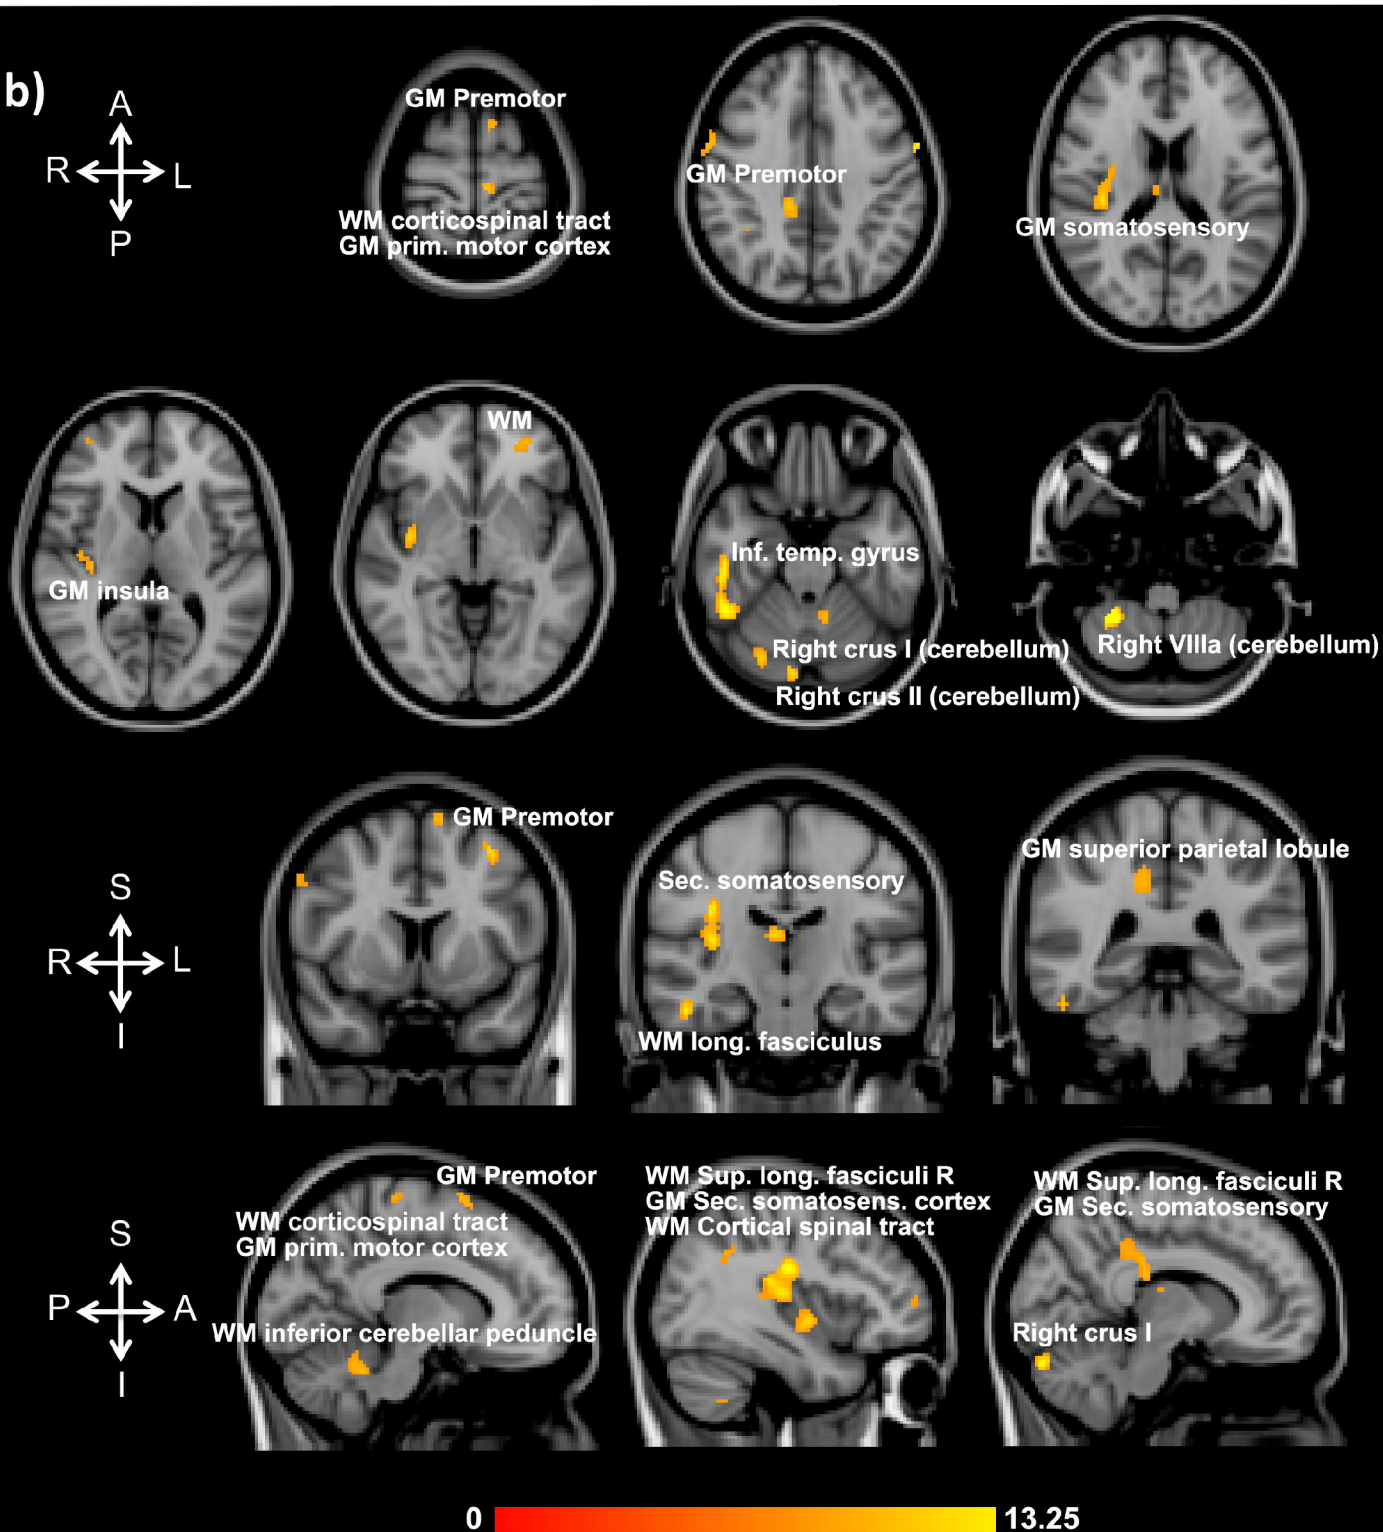

c)

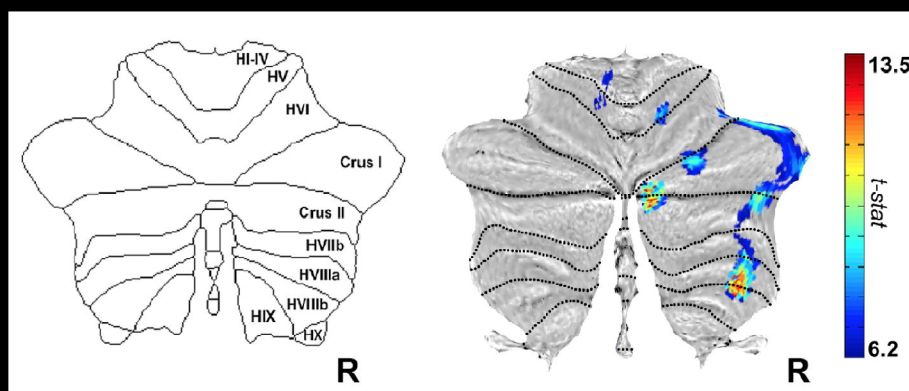

Table 1: Clusters of activations and identification of areas involved according to the Tailarach atlas in X|VIEW. In red are right (ipsilateral) clusters and in blue are left (contralateral) clusters with respect to the hand used for the task. Total sodium concentration (TSC) values and their standard errors (SE) for each cluster across 4 of the 8 volunteers are also reported. BA = Brodmann Area

| Cluster | N voxels | Peak MNI coordinates |     |     | Peak Description                                                                                 | Sub clusters                                                                                                                                                               | Mean TSC mmol/l (SE mmol/l) |
|---------|----------|----------------------|-----|-----|--------------------------------------------------------------------------------------------------|----------------------------------------------------------------------------------------------------------------------------------------------------------------------------|-----------------------------|
|         |          | X                    | Y   | Z   |                                                                                                  |                                                                                                                                                                            |                             |
| 1       | 612      | 28                   | -50 | -52 | Right Cerebellum // Cerebellum Posterior Lobe // Cerebellar Tonsil // Cerebellum_8_R (aal)       | Cerebellar Tonsil<br>Cerebellum 8 R (aal)<br>Inferior Temporal Gyrus BA 37<br>Fusiform R (aal)<br>Cerebellum Crus1 R (aal)<br>Middle Temporal Gyrus                        | 39 (4)                      |
| 2       | 55       | 12                   | -86 | -26 | Right Cerebellum // Cerebellum Posterior Lobe // Declive //Cerebellum_Crus1_R (aal)              | Declive<br>Cerebellum Crus1 R (aal)<br>Cerebellum Crus2 R (aal)                                                                                                            | 42 (5)                      |
| 4       | 45       | 28                   | -74 | -22 | Right Cerebrum // Cerebellum Posterior Lobe // Declive                                           | Declive<br>Cerebellum 6 R (aal)                                                                                                                                            | 36 (4)                      |
| 3       | 101      | -8                   | -50 | -28 | Left Cerebellum // Cerebellum Anterior Lobe // Fastigium                                         | Culmen<br>Cerebellum 4-5 L (aal)<br>Fastigium<br>Dentate                                                                                                                   | 35 (3)                      |
| 5       | 55       | 18                   | -60 | -10 | Right Cerebrum // Occipital Lobe // Lingual Gyrus // White Matter //Lingual_R (aal)              | Lingual R (aal)<br>BA 19<br>White Matter<br>Limbic Lobe<br>Parahippocampal Gyrus<br>Culmen<br>Right Cerebellum<br>Cerebellum Anterior Lobe                                 | 42 (3)                      |
| 6       | 66       | -36                  | 48  | -10 | Left Cerebrum // Frontal Lobe // Middle Frontal Gyrus // White Matter // Frontal_Mid_Orb_L (aal) | Frontal Mid Orb L (aal)<br>Gray Matter<br>BA 11<br>Frontal Sup Orb L (aal)                                                                                                 | 39 (5)                      |
| 7       | 432      | 38                   | -18 | 26  | Right Cerebrum // Sub-lobar // Extra-Nuclear // White Matter                                     | White Matter<br>Insula R (aal)<br>BA 13<br>Extra-Nuclear<br>Rolandic Oper R (aal)<br>Heschl R (aal)<br>Frontal Lobe<br>Putamen R (aal)                                     | 38 (3)                      |
| 8       | 20       | 44                   | 52  | 4   | Right Cerebrum // Frontal Lobe // Inferior Frontal Gyrus // White Matter // Frontal_Mid_R (aal)  | Frontal Mid R (aal)<br>Right cerebrum<br>White Matter                                                                                                                      | 30 (5)                      |
| 9       | 296      | 6                    | -18 | 14  | Right Cerebrum // Sub-lobar // Thalamus // Gray Matter // Thalamus_R (aal)                       | White Matter<br>Limbic Lobe<br>Cingulate Gyrus<br>Cingulum_Mid_R (aal)<br>Sub-lobar<br>Gray Matter<br>Extra-Nuclear<br>Thalamus_R (aal)<br>Corpus Callosum<br>Frontal Lobe | 59 (6)                      |
| 10      | 22       | 36                   | -48 | 36  | Right Cerebrum //                                                                                | Supramarginal Gyrus                                                                                                                                                        | 33 (4)                      |

|    |    |     |     |    |                                                                                                     |                                                                           |        |
|----|----|-----|-----|----|-----------------------------------------------------------------------------------------------------|---------------------------------------------------------------------------|--------|
|    |    |     |     |    | Parietal Lobe // White Matter                                                                       |                                                                           |        |
| 11 | 32 | -60 | 0   | 36 | Left Cerebrum // Frontal Lobe // Precentral Gyrus // BA 6 // Precentral_L (aal)                     | BA 6<br>Precentral_L (aal)<br>BA 4                                        | 31 (5) |
| 12 | 64 | 60  | 2   | 38 | Right Cerebrum // Frontal Lobe // precentral Gyrus // Grey Matter // BA 6 // precentral_R (aal)     | Precentral Gyrus<br>BA 6<br>Inferior Frontal Gyrus<br>Postcentral R (aal) | 29 (6) |
| 13 | 26 | -34 | 8   | 52 | Left Cerebrum // Frontal Lobe // Middle Frontal Gyrus // Gray Matter // BA 6 // Frontal_Mid_L (aal) | Frontal Mid L (aal)<br>White Matter<br>BA 6                               | 41 (4) |
| 14 | 24 | -46 | -32 | 58 | Left Cerebrum // Parietal Lobe // Postcentral Gyrus // Gray Matter // BA 2 // Postcentral_L (aal)   | BA 2<br>Postcentral_L (aal)<br>BA 4                                       | 36 (4) |
| 15 | 28 | -8  | 8   | 68 | Left Cerebrum // Frontal Lobe // Superior Frontal Gyrus // White Matter // Supp_Motor_Area_L (aal)  | Superior Frontal Gyrus<br>Supp Motor Area L (aal)<br>White Matter         | 45 (4) |
| 16 | 25 | -8  | -28 | 68 | Left Cerebrum // Frontal Lobe // Medial Frontal Gyrus // White Matter // Paracentral_Lobule_L (aal) | Paracentral Lob. L (aal)<br>White Matter<br>Medial Frontal Gyrus          | 45 (5) |
